# Supplementary material for: Interaction of borohydride stabilized silver nanoparticles with sulfur-containing organophosphates
Source: Royal Society of Chemistry journal article supplement (doi:10.1039/d1ra06911j), 2021-01-01
Supplement: d1ra06911j1.pdf [file d1ra06911j1.pdf]

## APPENDIX

### A. Characterization of synthesized borohydride stabilized silver nanoparticles

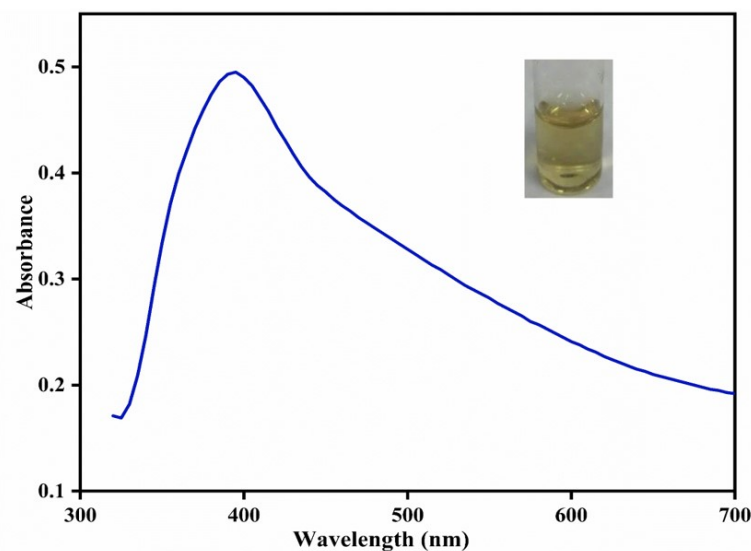

**Fig. A.1.** The UV-visible absorption spectrum of the colloidal silver nanoparticle synthesized.

**Table A.1.** Variation of absorbance peak and its intensity of solution containing synthesized silver nanoparticles with time at 4°C and 25°C

| Time from Synthesis Day |                             | 0     | 5 <sup>th</sup> Day | 10 <sup>th</sup> Day | 15 <sup>th</sup> day |
|-------------------------|-----------------------------|-------|---------------------|----------------------|----------------------|
| Storage temperature     |                             |       |                     |                      |                      |
| 4°C                     | $\lambda_{\text{max}}$ (nm) | 390   | 390                 | 390                  | 395                  |
|                         | Absorbance                  | 0.495 | 0.493               | 0.490                | 0.486                |
| 25°C                    | $\lambda_{\text{max}}$ (nm) | 390   | 390                 | 395                  | 395                  |
|                         |                             | 0.495 | 0.473               | 0.461                | 0.389                |

### B. Chemical Structure of the pesticides

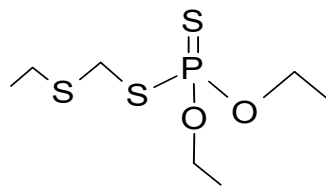

**Phorate**

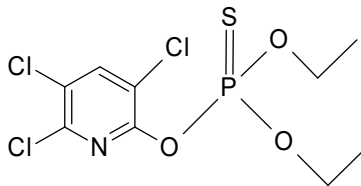

**Chlorpyrifos**

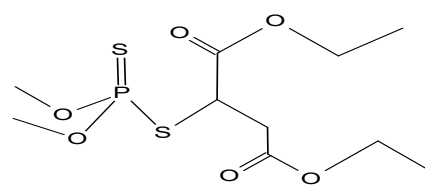

**Malathion**

**C. Color and UV-visible spectra change of NP-Phorate, NP- Chlorpyrifos and NP-Malathion mixture**

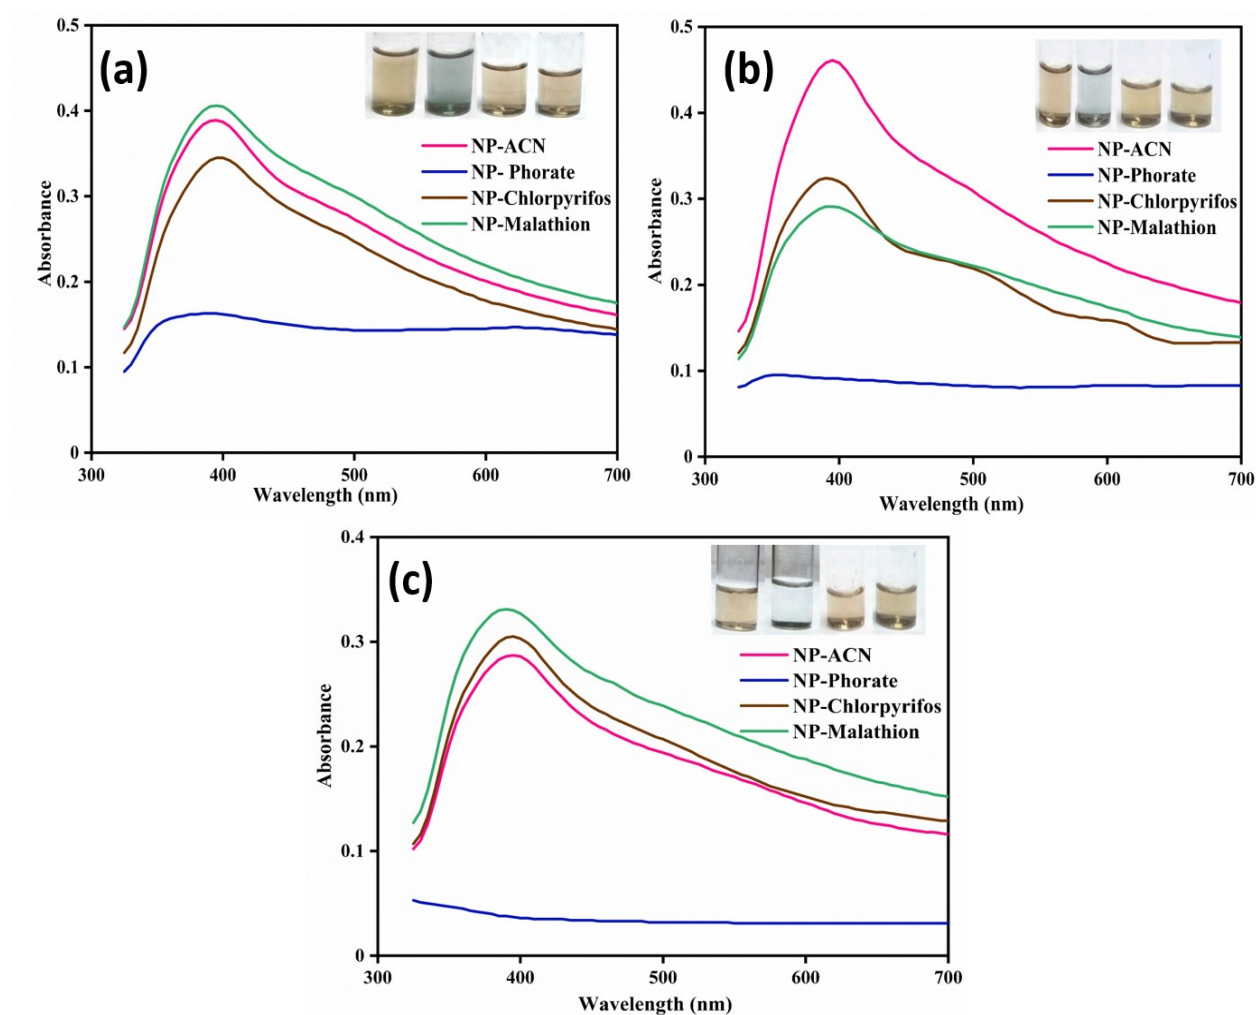

**Fig. C.1.** Image of color change and corresponding UV-visible spectra change for NP-ACN, NP-Phorate, NP-Chlorpyrifos, and NP-Malathion mixture at (a) half an hour (b) 2 hours and (c) 12 hours of incubation at 4°C

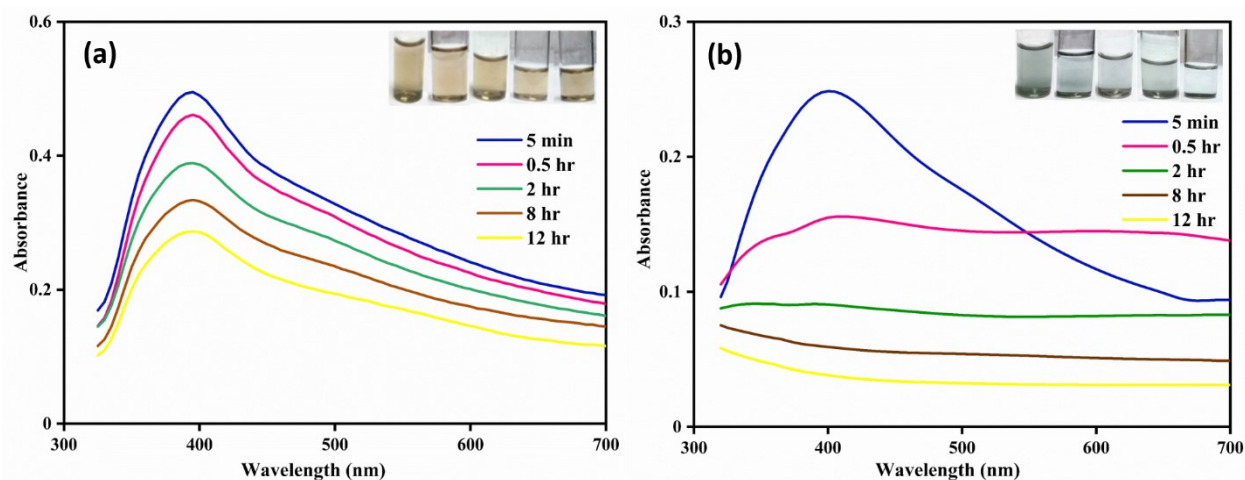

**Fig. C.2.** Image of color change and corresponding UV-visible spectra change for (a) NP with no phorate and (b) NP-Phorate mixture at 5min, 0.5, 2, 8, 12 hours of incubation along with control sample at 4°C

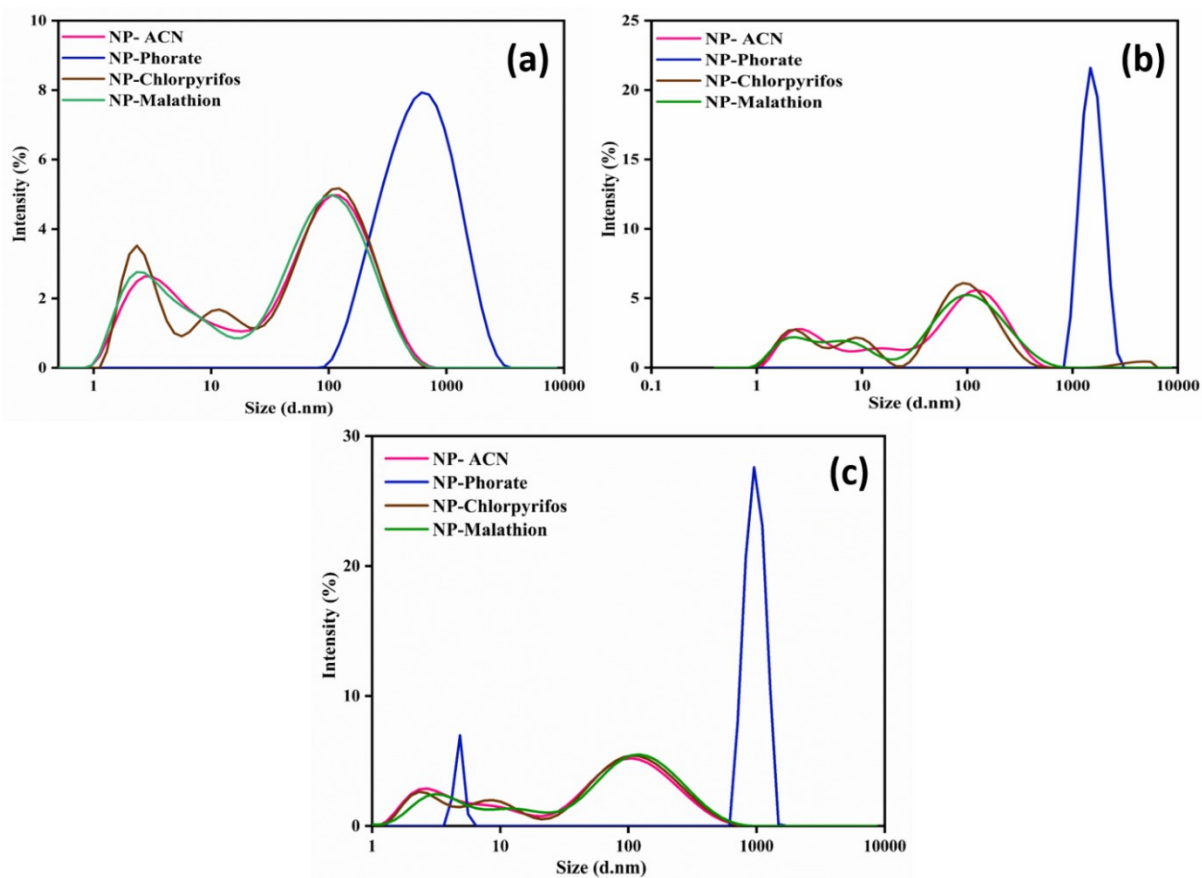

**Fig**

**. C.3.** Particle size distribution of NP-Phorate, NP- Chlorpyrifos and NP- Malathion mixture at (a) 5min (b) 2 hours and (c) 12 hours of incubation at 4°C

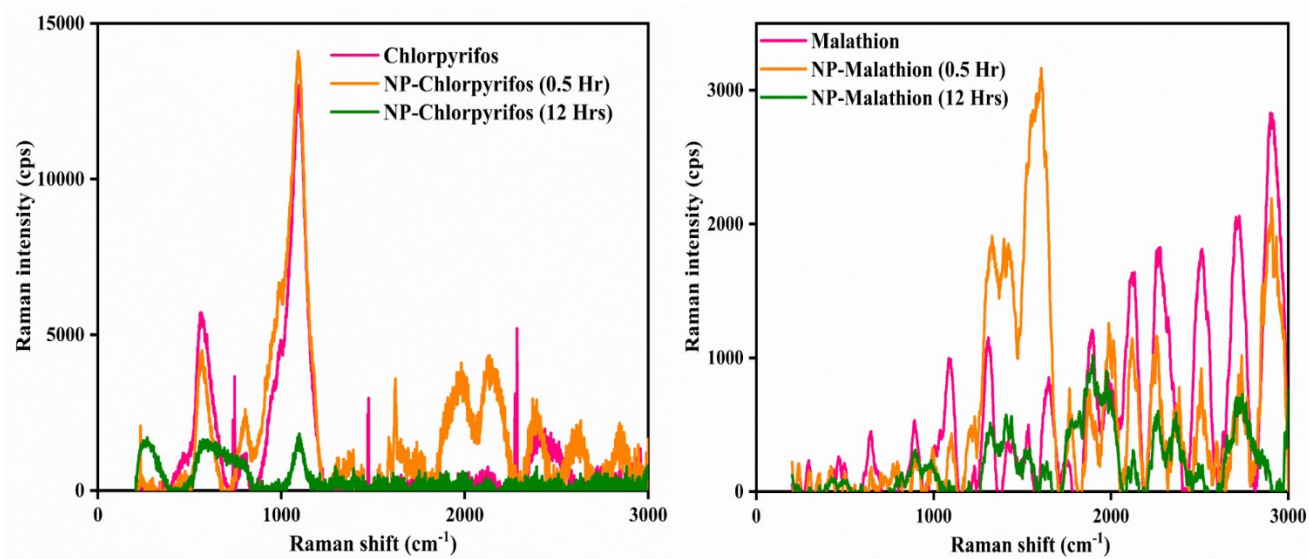

**Fig. C.4.** Raman spectra of chlorpyrifos, malathion, NP-chlorpyrifos, and NP-malathion mixture at 0.5 hours and after incubation of 12 hours

**D. Adsorption energy calculations of phorate molecule on the silver surface – Ag (1 1 1) using DFT simulation**

**Table D.1.** Graphical description of the various configurations for which the adsorption of phorate is studied on the silver surface – Ag (1 1 1)

| Bonding Moiety | Adsorption Site | Graphical Description                                                                |
|----------------|-----------------|--------------------------------------------------------------------------------------|
| -P=S           | top             | 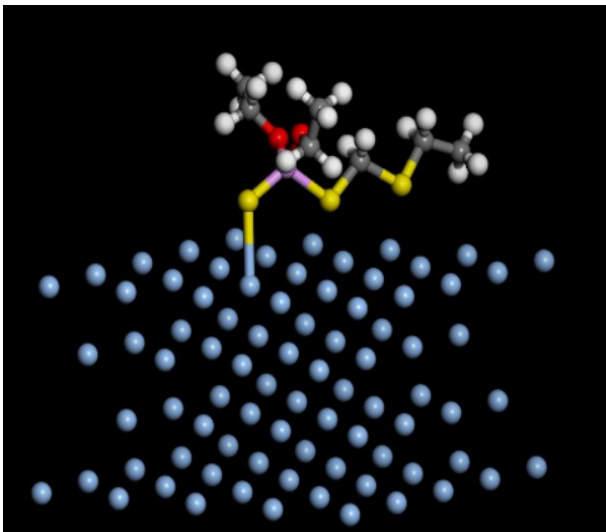  |
| -S- (S1)       | top             |  |

|           |          |                                                                                      |
|-----------|----------|--------------------------------------------------------------------------------------|
| -S- (S2)  | top      | 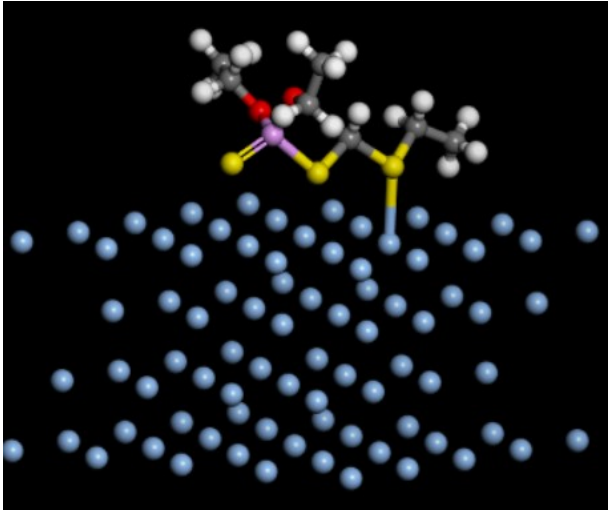   |
| -P=S, -S- | top, top |   |
| -S-, -S-  | top, top |  |

**Table D.2.** The adsorption energy of phorate in various configurations on the silver surface

– Ag (1 1 1) (including entropic contributions)

| <i>Bonding<br/>Moiety</i> | <i>Adsorption<br/>Site</i> | <b>Adsorption<br/>Energy<br/>(kcal/mol)</b> |
|---------------------------|----------------------------|---------------------------------------------|
| -P=S                      | top                        | -31.44                                      |
| -S- (S1)                  | top                        | -33.49                                      |
| -S- (S2)                  | top                        | -36.91                                      |
| -P=S, -S-                 | top, top                   | -33.49                                      |
| -S-, -S-                  | top, top                   | -37.46                                      |
